# Supplementary material
Source: Elsevier journal article supplement (https://www.sciencedirect.com/science/article/pii/S0213911121003423)
Supplement: mmc1 [file S0213911121003423:mmc1.doc]

## Apéndice

### Recomendaciones

A continuación, se describen las principales recomendaciones fruto del proceso colectivo de redacción, evaluación y deliberación sobre el *Informe sobre la agencia estatal de salud pública. Propuestas de la Sociedad Española de Salud Pública y Administración Sanitaria (SESPAS) para su diseño y funcionamiento:*

1. El modelo de estructura institucional que se propone para el Centro Estatal de Salud Pública es el modelo «agencia». Con ello, se dota de independencia técnica a la Agencia Estatal de Salud Pública (AESP) desde un contrato marco que define sus responsabilidades. Además, este modelo permite la ejecución de funciones de gestión directa, así como la influencia de la AESP en las políticas de salud pública, sustentándose esta última en su prestigio. Prestigio al que se llegará a través de su buen gobierno, del rigor científico-técnico en sus actuaciones, del ejercicio de la coordinación territorial priorizando la equidad y de una estética propia que cuide la puesta en escena y su discurso sobre la salud, mediante una estrategia de comunicación.
2. La AESP debe ser una pieza fundamental de la Estrategia Nacional de Largo Plazo (España 2050) con el fin de lograr una España más sostenible, saludable y competitiva que la actual, con el beneficio conjunto de toda la ciudadanía. Por ello, la AESP debe crearse como institución que contribuya decisivamente a la sostenibilidad del Sistema Nacional de Salud, a preparar nuestro estado de bienestar para una sociedad más longeva y a establecer sinergias que faciliten la transición ecológica.
3. La AESP nace, prioritariamente, para reforzar la inteligencia colectiva de la salud pública en España. El objetivo principal es liderar y coordinar la mejora cualitativa y cuantitativa de las funciones esenciales de salud pública que le sean asignadas y el apoyo catalizador a las implementadas en el conjunto del sistema de salud pública español (ver recomendación 6). No se trata únicamente de reunir centros ahora dispersos para evitar dispersión y duplicidades (lo que es deseable), sino que se trata de configurar una agencia capaz de contribuir a la Estrategia Nacional de Largo Plazo maximizando la eficiencia y la orientación innovadora y común en el desempeño de las actuaciones de salud pública estatal, así como su coordinación y eficiencia con las agencias supranacionales y con las funciones propias de las administraciones autonómicas y locales en materia de salud pública.
4. El contexto histórico, político y social en España, así como las funciones previstas para la AESP, hacen que su estructura deba ser necesariamente en red. La AESP contará con los mejores recursos en salud pública existentes en España, así como con la inteligencia colectiva agrupada de los distintos componentes de la red, incluyendo estructuras de las distintas administraciones y también otros centros y recursos de excelencia en salud pública de diversa naturaleza. A su vez, dichos recursos e inteligencia deberán circular por esa red, solventando problemas de desigualdades territoriales. Así, la estructura de la AESP será paraguas de nodos autonómicos, sin cesión de competencias ni recentralización de estas. Los nodos autonómicos se organizarán como cada comunidad autónoma lo determine para conseguir la máxima eficiencia.

1. La AESP actuará como institución interdependiente en una red de servicios de salud pública, así como de centros de excelencia, expertos e incluso otros sectores de la administración. El prestigio de la institución será un valor instrumental fundamental para que esta tenga una verdadera influencia en su labor inductora. Este prestigio se alcanza, entre otras cosas, asegurando la independencia de las designaciones de cargos unipersonales, la independencia técnica (a partir del contrato marco con el Ministerio de Sanidad) y la capacidad para atraer y retener talento con unas políticas de personal atractivas y flexibles, acordes con estos fines.
2. Las funciones sobre las que la AESP fundamentará su trabajo de coordinación, y en ocasiones de ejecución, se enumeran a continuación. Las ocho primeras son funciones de gestión directa («lo que hace la AESP»), mientras que las cuatro últimas son de asesoramiento y apoyo, eminentemente para catalizar la acción de los distintos actores («lo que facilita hacer la AESP»):
   1. La vigilancia en salud entendida como una vigilancia integral, que incluya desde los determinantes proximales de la salud hasta los más distales (relacionados con los activos comunitarios y las políticas públicas y privadas que afectan a la salud de las personas), incluyendo inexcusablemente los determinantes sociales de la salud. Por lo tanto, esta función debe incluir el liderazgo y la coordinación de la Red de Vigilancia en Salud Pública (RENAVE), debiendo esta integrarse plenamente en la AESP, con el objetivo de disponer de información actualizada y orientada a la acción en salud pública.
   2. La preparación del sistema sanitario ante alertas y amenazas para la salud pública, contemplando no solo las relativas a enfermedades transmisibles, sino también otras alertas (como por ejemplo catástrofes naturales o accidentes industriales), y la coordinación de las respuestas a ellas. Estas respuestas deberían partir no solo del reconocimiento institucional del papel clave de los servicios de salud pública y de los centros de excelencia en dichas crisis, sino también de la creación y el fortalecimiento de espacios intersectoriales comunes previamente construidos (no solo dentro de la administración, sino también fuera de esta, con otros agentes clave para la salud pública, como el tercer sector), agilizando y mejorando así la respuesta en tiempos de crisis.
   3. El apoyo, la coordinación, el seguimiento y la evaluación de las estrategias relacionadas con la salud pública, incluyendo el seguimiento y la evaluación de la Estrategia de Salud Pública, que debe integrar otros esfuerzos relacionados (por ejemplo, la Estrategia de Promoción de la Salud y Prevención en el Sistema Nacional de Salud, la Estrategia de Seguridad y Salud en el Trabajo o la Estrategia Nacional de Equidad en Salud), siendo especialmente crítica, cuando se requiera, con aquellas orientaciones en las que el paradigma asistencialista haya privado del necesario enfoque salubrista para atender los problemas de salud.
   4. La interacción y la coordinación con organismos supranacionales en materia de salud pública. La verticalidad en sus relaciones institucionales también debe beneficiar los niveles infraestatales (autonómico y local).
   5. La evaluación de políticas y programas con impacto en la salud pública. Esta debería ser una de las funciones insignes y prioritarias de la AESP. Dada su estructura orgánica en red, su plantilla multidisciplinaria y sus labores intersectoriales, la AESP estaría capacitada para llevar la evaluación de políticas y programas con un impacto sobre la salud pública, propuestos o ejecutados desde cualquier sector (no solo desde el sector sanitario o el Sistema Nacional de Salud).
   6. La participación en el funcionamiento de la Comisión de Salud Pública y de las Ponencias relacionadas con la salud pública del Consejo Interterritorial del Sistema Nacional de Salud. Siendo Comisión y Ponencias agentes clave para la toma de decisiones políticas en materia sanitaria y de salud pública, la AESP debería implicarse en la planificación y el seguimiento de su agenda. Así, entre otras cuestiones, la AESP podría implicarse en la revisión y la actualización de la Cartera de Servicios de Salud Pública del Sistema Nacional de Salud .
   7. El desarrollo de una *Estrategia para la Salud en Todas las Políticas* y la promoción del enfoque de *Una Sola Salud,* todo ello en línea con los *Objetivos de Desarrollo Sostenible,* que orienten tanto el desempeño de sus propias funciones como las de otros servicios de salud pública en las administraciones.
   8. El asesoramiento y la financiación para facilitar la acción en salud pública a través de programas e intervenciones que puedan llevar a cabo las administraciones autonómicas y locales, o sus entidades y colectivos aliados en la sociedad, y su mejora progresiva bajo criterios científicos.
   9. El apoyo y el asesoramiento para la estrategia comunicativa y de respuesta ante demandas o necesidades de información en las administraciones y en la sociedad. La AESP debe posicionarse en asuntos de importancia para la salud poblacional (desde el uso de mascarillas [cuándo, cómo y dónde] hasta recomendaciones sobre otros determinantes de la salud con impacto mediático).
   10. El apoyo y el asesoramiento para el desarrollo de legislación básica con un impacto sobre la salud pública, así como la trasposición de legislación europea al respecto. Con este objetivo, la AESP podría hacer disponibles para la administración los textos legales más efectivos y con mejor calidad normativa.
   11. Desarrollo de políticas y prioridades de formación (competencias profesionales), de desarrollo (carrera profesional) y de investigación en salud pública.
   12. El apoyo y el asesoramiento para la toma de decisiones que afecten a la salud pública, determinando procesos deliberativos, participativos y participados, estructurados, transparentes, documentados y evaluados.
3. En relación íntima con la función de vigilancia, la Agencia Estatal de Salud Pública debe tener, entre sus mandatos, cumplir y hacer cumplir el artículo 4 de la Ley General de Salud Pública, sobre el derecho a la información en materia de salud pública de la ciudadanía. Ello debe establecerse como finalidad en los datos que la AESP recoja, procese, analice, difunda o comunique. De igual manera debe ser establecida esta finalidad por todas aquellas instituciones que colaboren con la AESP, en lo que se refiere a la cesión o el acceso a los datos que gestionen y que sean incorporados a la información que, en materia de salud pública, gestione la AESP para dar cumplimiento a sus funciones.
4. Una agencia con los principios y objetivos innovadores descritos requiere también fórmulas innovadoras no solo en la designación de sus cargos y en su independencia técnica (recomendación 5), sino también en la composición y la selección de su personal, para lo que deberían considerarse distintas fórmulas, incluyendo alternativas a las que establece el marco de la función pública. Debería prevalecer también el criterio de incorporar talento joven en la propia estructura de la agencia.
5. En lo relativo al *data-lake* sanitario en desarrollo, será imprescindible la presencia de la AESP en dicho proceso, con el fin de que pueda asesorar y evaluar correctamente las políticas y los programas de salud pública. Además, será también un requisito indispensable para la integración vertical de la AESP con los organismos internacionales.
6. La AESP tendrá dos líneas: preparar el *data-lake* sanitario (que debiera ser «lago de datos de salud», y disponer también su futura utilización y explotación basada en el conocimiento existente), y además seguir con el mantenimiento (o incluso el montaje) de los sistemas de información en salud existentes (no solo sanitarios), habilitándolos para un uso diferente y un mejor acceso. Respecto a esta última línea, el objetivo de la AESP debe ser el uso de sistemas de información locales, no la expropiación de estos (lógica de no injerencia). Esto se consigue explicitando que el objetivo verdadero de la AESP sería conseguir una estructura de modelo de datos común, y no sistemas de información idénticos. Los datos deben ser interrogables en cualquier momento.
7. La innovación en la AESP, también desde su propia creación como agencia, requerirá la participación de las generaciones de jóvenes profesionales vinculados/as con la salud pública en sus múltiples facetas, ya que son quienes afrontarán los retos del futuro. Del mismo modo, la AESP necesita partir de, y mantener, fuertes vínculos con la sociedad a la que presta sus servicios, estableciendo vías directas de participación y colaboración para conocer sus necesidades y activos, percepciones y expectativas en relación con la salud.
8. En el ámbito de la investigación, la conformación de la AESP deberá adoptar un modelo que permita la interacción constante de sus profesionales con los ámbitos académicos y de los centros de investigación de excelencia en salud pública.
